# Supplementary material for: Biological Features Implies Potential Use of Autologous Adipose-Derived Stem/Progenitor Cells in Wound Repair and Regenerations for the Patients with Lipodystrophy
Source: PubMed Central journal article supplement (PMC6862495; doi:10.3390/ijms20215505), 2019-11-05
Supplement: ijms-20-05505-s001.pdf [file ijms-20-05505-s001.pdf]

Table S1 Summary of patients' therapies

---

| Patient ID | Treatments                                                                                    |
|------------|-----------------------------------------------------------------------------------------------|
| #1, #3     | indinavir, lamivudine (3TC), d4T, atazanavir,<br>Euzicom (3TC and abacavir combination)       |
| #2         | AZT, didanosine, 3TC, d4T, atazanavir, tenofovir/emtricitabine                                |
| #4         | AZT, didanosine, lamivudine (3TC), nelfinavir, d4T,<br>Euzicom (3TC and abacavir combination) |

---
